# Supplementary material
Source: publisher site journal article supplement (https://www.dovepress.com/article/433525)
Supplement: Supplementary file 1 [file get_supplementary_file.php]

Table S1. Information of AVF samples and native cephalic veins collected from patients

| Sample | Gender | Age | Cause of revision | | Type of revision | | Time after creation  (months) |
| --- | --- | --- | --- | --- | --- | --- | --- |
| AVF1 | Male | 55 | kidney transplant | | Ligation of AVF | | 15.6 |
| AVF2 | Male | 59 | kidney transplant | | Ligation of AVF | | 56.4 |
| AVF3 | Male | 61 | kidney transplant | | Ligation of AVF | | 30.0 |
| AVF4 | Male | 63 | kidney transplant | | Ligation of AVF | | 26.4 |
| AVF5 | Male | 57 | kidney transplant | | Ligation of AVF | | 34.8 |
|  |  | 59.00±3.16 |  |  | | 32.64±15.05 | |
| Vein1 | Male | 54 | — | — | | 0 | |
| Vein2 | Male | 56 | — | — | | 0 | |
| Vein3 | Male | 51 | — | — | | 0 | |
| Vein4 | Male | 59 | — | — | | 0 | |
| Vein5 | Male | 49 | — | — | | 0 | |
|  |  | 53.80±3.96 |  |  | | 0 | |

Vein: native cephalic vein, collected from patients who underwent first operation of AVF creation.

Table S2. Significantly enriched KEGG pathways identified from GSE119296

| **Term ID** | **Term description** | **Enrichment score** | **p-value** | **FDR** | **Classification level** |
| --- | --- | --- | --- | --- | --- |
| path: hsa05144 | Malaria | 5.316 | 0.000 | 0.000 | Human Diseases |
| path: hsa05150 | Staphylococcus aureus infection | 4.781 | 0.000 | 0.000 | Human Diseases |
| path: hsa00524 | Neomycin, kanamycin and gentamicin biosynthesis | 4.736 | 0.060 | 0.233 | Metabolism |
| path: hsa05143 | African trypanosomiasis | 4.179 | 0.000 | 0.000 | Human Diseases |
| path: hsa05323 | Rheumatoid arthritis | 3.993 | 0.000 | 0.000 | Human Diseases |
| path: hsa04657 | IL-17 signaling pathway | 3.947 | 0.000 | 0.000 | Organismal Systems |
| path: hsa05134 | Legionellosis | 3.660 | 0.000 | 0.000 | Human Diseases |
| path: hsa04380 | Osteoclast differentiation | 3.599 | 0.000 | 0.000 | Organismal Systems |
| path: hsa05140 | Leishmaniasis | 3.552 | 0.000 | 0.000 | Human Diseases |
| path: hsa05020 | Prion diseases | 3.482 | 0.000 | 0.003 | Human Diseases |

Table S3. The significantly enriched KEGG pathway from GSEA

| **Pathway** | **Size** | **Enrichment Score** | **Normalized Enrichment Score** | **p-value** | **FDR** |
| --- | --- | --- | --- | --- | --- |
| KEGG_PATHWAYS_IN_CANCER | 313 | 0.537 | 1.930 | 0.000 | 0.001 |
| KEGG_MAPK_SIGNALING_PATHWAY | 249 | 0.549 | 1.950 | 0.000 | 0.001 |
| KEGG_CYTOKINE_CYTOKINE_RECEPTOR_INTERACTION | 222 | 0.722 | 2.550 | 0.000 | 0.001 |
| KEGG_FOCAL_ADHESION | 197 | 0.527 | 1.846 | 0.000 | 0.001 |
| KEGG_CHEMOKINE_SIGNALING_PATHWAY | 173 | 0.638 | 2.218 | 0.000 | 0.001 |
| KEGG_JAK_STAT_SIGNALING_PATHWAY | 127 | 0.641 | 2.167 | 0.000 | 0.001 |
| KEGG_CELL_CYCLE | 124 | 0.648 | 2.187 | 0.000 | 0.001 |
| KEGG_NATURAL_KILLER_CELL_MEDIATED_CYTOTOXICITY | 115 | 0.602 | 2.018 | 0.000 | 0.001 |
| KEGG_SYSTEMIC_LUPUS_ERYTHEMATOSUS | 111 | 0.658 | 2.198 | 0.000 | 0.001 |
| KEGG_T_CELL_RECEPTOR_SIGNALING_PATHWAY | 103 | 0.660 | 2.183 | 0.000 | 0.001 |
| KEGG_TOLL_LIKE_RECEPTOR_SIGNALING_PATHWAY | 89 | 0.697 | 2.270 | 0.000 | 0.001 |
| KEGG_ECM_RECEPTOR_INTERACTION | 83 | 0.655 | 2.110 | 0.000 | 0.001 |
| KEGG_HEMATOPOIETIC_CELL_LINEAGE | 81 | 0.756 | 2.426 | 0.000 | 0.001 |
| KEGG_B_CELL_RECEPTOR_SIGNALING_PATHWAY | 73 | 0.634 | 2.004 | 0.000 | 0.001 |
| KEGG_P53_SIGNALING_PATHWAY | 68 | 0.703 | 2.204 | 0.000 | 0.001 |
| KEGG_LEISHMANIA_INFECTION | 67 | 0.752 | 2.351 | 0.000 | 0.001 |
| KEGG_NOD_LIKE_RECEPTOR_SIGNALING_PATHWAY | 61 | 0.759 | 2.335 | 0.000 | 0.001 |
| KEGG_INTESTINAL_IMMUNE_NETWORK_FOR_IGA_PRODUCTION | 40 | 0.728 | 2.090 | 0.000 | 0.001 |
| KEGG_GRAFT_VERSUS_HOST_DISEASE | 34 | 0.738 | 2.057 | 0.000 | 0.001 |
| KEGG_ASTHMA | 22 | 0.773 | 1.977 | 0.000 | 0.001 |
| KEGG_CELL_ADHESION_MOLECULES_CAMS | 124 | 0.534 | 1.801 | 0.000 | 0.001 |
| KEGG_FC_EPSILON_RI_SIGNALING_PATHWAY | 71 | 0.598 | 1.888 | 0.000 | 0.001 |
| KEGG_CYTOSOLIC_DNA_SENSING_PATHWAY | 41 | 0.702 | 2.023 | 0.000 | 0.001 |
| KEGG_PRION_DISEASES | 35 | 0.734 | 2.057 | 0.000 | 0.001 |
| KEGG_WNT_SIGNALING_PATHWAY | 145 | 0.499 | 1.710 | 0.000 | 0.002 |
| KEGG_SMALL_CELL_LUNG_CANCER | 83 | 0.572 | 1.842 | 0.000 | 0.002 |
| KEGG_BLADDER_CANCER | 42 | 0.689 | 1.994 | 0.000 | 0.002 |
| KEGG_PRIMARY_IMMUNODEFICIENCY | 33 | 0.698 | 1.937 | 0.000 | 0.002 |
| KEGG_COLORECTAL_CANCER | 61 | 0.610 | 1.877 | 0.001 | 0.002 |
| KEGG_ALLOGRAFT_REJECTION | 32 | 0.692 | 1.908 | 0.001 | 0.002 |
| KEGG_APOPTOSIS | 85 | 0.567 | 1.833 | 0.001 | 0.002 |
| KEGG_COMPLEMENT_AND_COAGULATION_CASCADES | 67 | 0.590 | 1.845 | 0.001 | 0.002 |
| KEGG_LEUKOCYTE_TRANSENDOTHELIAL_MIGRATION | 109 | 0.516 | 1.720 | 0.001 | 0.003 |
| KEGG_ANTIGEN_PROCESSING_AND_PRESENTATION | 66 | 0.577 | 1.803 | 0.001 | 0.003 |
| KEGG_TYPE_I_DIABETES_MELLITUS | 38 | 0.656 | 1.865 | 0.001 | 0.004 |
| KEGG_ERBB_SIGNALING_PATHWAY | 84 | 0.534 | 1.725 | 0.002 | 0.007 |
| KEGG_AXON_GUIDANCE | 127 | 0.483 | 1.634 | 0.002 | 0.007 |
| KEGG_EPITHELIAL_CELL_SIGNALING_IN_HELICOBACTER_PYLORI_INFECTION | 67 | 0.553 | 1.729 | 0.002 | 0.007 |
| KEGG_VEGF_SIGNALING_PATHWAY | 70 | 0.549 | 1.731 | 0.003 | 0.007 |
| KEGG_AUTOIMMUNE_THYROID_DISEASE | 35 | 0.626 | 1.754 | 0.004 | 0.010 |
| KEGG_PANCREATIC_CANCER | 69 | 0.539 | 1.697 | 0.004 | 0.010 |
| KEGG_TGF_BETA_SIGNALING_PATHWAY | 83 | 0.519 | 1.674 | 0.004 | 0.011 |
| KEGG_PATHOGENIC_ESCHERICHIA_COLI_INFECTION | 53 | 0.569 | 1.715 | 0.004 | 0.011 |
| KEGG_FC_GAMMA_R_MEDIATED_PHAGOCYTOSIS | 94 | 0.495 | 1.623 | 0.006 | 0.014 |
| KEGG_PROSTATE_CANCER | 86 | 0.505 | 1.636 | 0.006 | 0.015 |
| KEGG_SULFUR_METABOLISM | 11 | 0.777 | 1.720 | 0.008 | 0.018 |
| KEGG_ENDOCYTOSIS | 178 | 0.424 | 1.475 | 0.009 | 0.020 |
| KEGG_RIG_I_LIKE_RECEPTOR_SIGNALING_PATHWAY | 58 | 0.528 | 1.612 | 0.010 | 0.024 |
| KEGG_CHRONIC_MYELOID_LEUKEMIA | 70 | 0.504 | 1.587 | 0.013 | 0.028 |
| KEGG_REGULATION_OF_ACTIN_CYTOSKELETON | 202 | 0.401 | 1.406 | 0.015 | 0.031 |

Table S4. The Differentially Expressed immune-related Genes identified from GSE39488

| Gene symbol | log2FC | p-value | adjusted p-value |
| --- | --- | --- | --- |
| RXFP1 | -4.7766248 | 1.07E-08 | 0.000475 |
| INHBA | -2.8706021 | 3.21E-07 | 0.001311 |
| THBS1 | -2.3760704 | 1.80E-06 | 0.004207 |
| NR4A3 | -5.2127667 | 5.58E-06 | 0.011084 |
| NR4A2 | -3.8415928 | 1.53E-05 | 0.01796 |
| OLR1 | -3.4160306 | 2.16E-05 | 0.020621 |
| TNFRSF12A | -3.1166232 | 1.87E-05 | 0.020621 |
| SEMA7A | -2.458311 | 3.20E-05 | 0.025897 |
| NR4A1 | -4.5912152 | 6.03E-05 | 0.029007 |
| CCL3 | -3.9904548 | 7.69E-05 | 0.029007 |
| CCL4 | -3.7178843 | 5.56E-05 | 0.029007 |
| FGF1 | -3.6000121 | 5.71E-05 | 0.029007 |
| TNFRSF11B | -2.7638094 | 6.70E-05 | 0.029007 |
| CXCR4 | -2.3881324 | 6.03E-05 | 0.029007 |
| COLEC10 | -2.3644935 | 4.76E-05 | 0.029007 |
| SEMA6A | 2.2601163 | 6.14E-05 | 0.029007 |
| APOD | 2.8287472 | 4.70E-05 | 0.029007 |
| SEMA3E | 2.855126 | 5.25E-05 | 0.029007 |
| NR0B1 | 3.6520038 | 6.08E-05 | 0.029007 |
| IL1RL1 | -3.7121008 | 9.03E-05 | 0.030862 |
| DUOX1 | -2.1943481 | 1.23E-04 | 0.033925 |
| FOS | -5.2871904 | 2.20E-04 | 0.047366 |
| CRABP1 | -5.0200705 | 2.66E-04 | 0.051549 |
| SHC4 | -1.9991193 | 3.23E-04 | 0.058679 |
| CCL3L3 | -2.5973182 | 3.99E-04 | 0.064609 |
| TUBB3 | -3.4364145 | 4.29E-04 | 0.065792 |
| ADIPOQ | 3.5256836 | 5.01E-04 | 0.069396 |
| JUN | -2.4152134 | 5.09E-04 | 0.069916 |
| IL6 | -4.9159673 | 5.46E-04 | 0.072476 |
| S100B | 2.8308815 | 5.51E-04 | 0.072951 |
| HSPA8 | -2.7939115 | 5.92E-04 | 0.076321 |
| OSM | -3.3344492 | 7.12E-04 | 0.084763 |
| OXTR | -3.2593101 | 7.35E-04 | 0.085346 |
| OASL | -1.5995352 | 7.33E-04 | 0.085346 |
| PCSK2 | 3.5280364 | 7.86E-04 | 0.089014 |
| PTGS2 | -2.5668869 | 8.25E-04 | 0.091969 |
| IL1B | -3.8062436 | 8.55E-04 | 0.094113 |
